# Supplementary material
Source: publisher figshare collection journal article supplement (https://rs.figshare.com/ndownloader/files/12559256)
Supplement: Supplementary file 1 [file 12559256]

**Supplemental Information**

**Table S1:** Comparison of mating related parameters (means ± SD) in mating experiments with asymmetrically manipulated males (one titillator shortened). Differences between matings in the two groups were marginally and not significant.

|  | **1st group** | | **2nd group** | |  |
| --- | --- | --- | --- | --- | --- |
|  | **control females** | **glue-covered** | **pymetrozine treated** | **pymetrozine treated + 1d** | **Statistical analysis** |
| **Male body mass  / mg** | 287.6 ± 46.4  n= 16 | 285.9 ± 25.8  n= 16 | 283.3 ± 28.8  n= 20 | 289.8 ± 29.9  n= 20 | ANOVA: F3,68=0.14, p=0.94 |
| **Spermatophore mass / mg** | 36.4± 8.6  n= 15 | 38.1 ± 7.1  n= 16 | 33.5 ± 5.0  n= 20 | 33.4 ± 5.5  n= 20 | Kruskal-Wallis-Test: χ23= 6.17, p= 0.10 |
| **Copula duration / min** | 35.2 **±** 7.4  n= 16 | 34.9 **±** 6.7  n= 16 | 35.2 **±** 6.7  n= 20 | 34.9 **±** 4.7  n= 20 | Paired T-test: Tgroup1=-0.091, p=0.93  Tgroup2=0.22, p=0.83 |
| **Spermatophore transfer duration**  **/ min** | 1.4 ± 0.4  n= 15 | 1.4 ± 0.2  n= 16 | 1.5 ± 0.3  n= 20 | 1.5 ± 0.2  n= 20 | Paired T-test: Tgroup1=-0.16, p=0.88  Wilcoxon rank-sum test:  Zgroup2=- 0.20, p=0.84 |
| **Titillator movements  / min** | 9.6 ± 3.2  n= 16 | 10.1 ± 3.4  n= 16 | 11.3 ± 3.0  n= 20 | 10.4 ± 2.3  n= 20 | Paired T-test: Tgroup1=-0.49, p=0.63  Tgroup2=1.17, p=0.26 |
| **Success of spermatophore transfer** | 93.75 %  n= 16 | 100 %  n= 16 | 100 %  n= 20 | 100 %  n= 20 | Fisher’s exact Test: group1: p>0.05  group2: constant |
| **Female walking duration**  **/ min** | 1.3 ± 1.5  n= 6 | - | 0.1  n= 1 | 0.6 ± 0.2  n= 7 |  |
